# Supplementary material for: Association between Wait Time for Transthoracic Echocardiography and 28-Day Mortality in Patients with Septic Shock: A Cohort Study
Source: MDPI journal article supplement (doi:10.3390/jcm11144131), 2022-07-16
Supplement: s1 [file s1]

Supplementary Table S1. Relationship between TTE wait time as a continuous variable and 28-day mortality in two-piece-wise Cox regression model.

| Wait time (as a continuous variable) | HR (95% CI)       | P value |
|--------------------------------------|-------------------|---------|
| ≤10 hours                            | 1.05 (1.01, 1.10) | 0.013   |
| > 10 hours                           | 0.99 (0.98, 1.01) | 0.349   |
| Log likelihood ratio test            |                   | 0.015   |
