# Supplementary material for: Association between Wait Time for Transthoracic Echocardiography and 28-Day Mortality in Patients with Septic Shock: A Cohort Study
Source: MDPI journal article supplement (doi:10.3390/jcm11144131), 2022-07-16
Supplement: s1 [file s1]

Supplementary Table S2. Baseline characteristics of participants

| Covariate                             | All patients      | Unmatched Patients   |                     |                   | Propensity-Score-Matched Patients |                     |         |
|---------------------------------------|-------------------|----------------------|---------------------|-------------------|-----------------------------------|---------------------|---------|
|                                       |                   | Time of TTE          |                     |                   | Time of TTE                       |                     |         |
|                                       |                   | Early ( $\leq 10$ h) | Delayed ( $> 10$ h) | P value           | Early ( $\leq 10$ h)              | Delayed ( $> 10$ h) | P value |
| N                                     | 3264              | 544                  | 2720                |                   | 532                               | 532                 |         |
| Age(years) , mean (SD)                | 67.8 $\pm$ 16.0   | 68.9 $\pm$ 15.0      | 67.6 $\pm$ 16.1     | 0.078             | 68.7 $\pm$ 15.1                   | 68.8 $\pm$ 15.0     | 0.890   |
| Male, sex, no.(%)                     | 1758 (53.9)       | 310 (57.0)           | 1448 (53.2)         | 0.109             | 301 (56.6)                        | 296 (55.6)          | 0.757   |
| Weight (kg) , mean (SD)               | 82.2 $\pm$ 25.2   | 83.1 $\pm$ 24.6      | 82.0 $\pm$ 25.3     | 0.353             | 83.3 $\pm$ 24.6                   | 83.9 $\pm$ 28.1     | 0.724   |
| <b>Vital Signs, mean (SD)</b>         |                   |                      |                     |                   |                                   |                     |         |
| Heart rate (bpm)                      | 94.3 $\pm$ 21.8   | 92.2 $\pm$ 21.9      | 94.7 $\pm$ 21.8     | <b>0.012</b>      | 92.4 $\pm$ 22.1                   | 92.0 $\pm$ 21.0     | 0.798   |
| MAP (mmHg)                            | 75.5 $\pm$ 18.6   | 74.2 $\pm$ 18.1      | 75.8 $\pm$ 18.7     | 0.069             | 74.3 $\pm$ 18.2                   | 74.7 $\pm$ 17.0     | 0.730   |
| Respiratory rate (bpm)                | 20.1 $\pm$ 6.7    | 18.7 $\pm$ 6.8       | 20.4 $\pm$ 6.6      | <b>&lt; 0.001</b> | 18.7 $\pm$ 6.8                    | 18.9 $\pm$ 6.7      | 0.592   |
| <b>Laboratory tests, mean (SD)</b>    |                   |                      |                     |                   |                                   |                     |         |
| WBC ( $\times 10^9$ )                 | 14.9 $\pm$ 11.0   | 15.0 $\pm$ 8.7       | 14.9 $\pm$ 11.4     | 0.753             | 15.0 $\pm$ 8.8                    | 14.8 $\pm$ 8.9      | 0.606   |
| Hemoglobin (g/L)                      | 10.6 $\pm$ 2.7    | 10.5 $\pm$ 2.3       | 10.6 $\pm$ 2.7      | 0.143             | 10.5 $\pm$ 2.3                    | 10.6 $\pm$ 2.1      | 0.577   |
| Platelet ( $\times 10^{12}$ )         | 216.0 $\pm$ 127.2 | 206.3 $\pm$ 112.6    | 217.9 $\pm$ 129.9   | <b>0.034</b>      | 207.4 $\pm$ 112.6                 | 209.5 $\pm$ 119.9   | 0.774   |
| Sodium (mmol/L)                       | 138.2 $\pm$ 5.5   | 137.4 $\pm$ 4.5      | 138.3 $\pm$ 5.7     | <b>&lt; 0.001</b> | 137.5 $\pm$ 4.5                   | 137.6 $\pm$ 5.3     | 0.858   |
| Potassium (mmol/L)                    | 4.2 $\pm$ 0.9     | 4.4 $\pm$ 0.9        | 4.2 $\pm$ 0.9       | <b>&lt; 0.001</b> | 4.3 $\pm$ 0.9                     | 4.3 $\pm$ 1.1       | 0.354   |
| Chloride (mmol/L)                     | 106.4 $\pm$ 6.9   | 106.3 $\pm$ 5.8      | 106.5 $\pm$ 7.1     | 0.550             | 106.3 $\pm$ 5.8                   | 106.4 $\pm$ 6.6     | 0.856   |
| Bicarbonate (mmol/L)                  | 21.2 $\pm$ 5.1    | 21.3 $\pm$ 4.6       | 21.2 $\pm$ 5.2      | 0.537             | 21.3 $\pm$ 4.7                    | 21.2 $\pm$ 4.7      | 0.922   |
| Creatinine (mg/dL)                    | 1.7 $\pm$ 1.5     | 1.6 $\pm$ 1.2        | 1.7 $\pm$ 1.6       | 0.052             | 1.6 $\pm$ 1.2                     | 1.6 $\pm$ 1.2       | 0.860   |
| BUN (mg/dL)                           | 33.6 $\pm$ 24.7   | 30.8 $\pm$ 20.6      | 34.2 $\pm$ 25.4     | <b>0.003</b>      | 31.0 $\pm$ 20.7                   | 30.4 $\pm$ 19.7     | 0.655   |
| BNP (tested) , n (%)                  | 73 (2.2)          | 8 (1.5)              | 65 (2.4)            | 0.184             | 8 (1.5)                           | 7 (1.3)             | 0.795   |
| Troponin (tested) , n (%)             | 1307 (40.0)       | 243 (44.7)           | 1064 (39.2)         | <b>0.018</b>      | 238 (44.7)                        | 225 (42.3)          | 0.421   |
| Creatinine kinase (tested) , n (%)    | 1847 (56.6)       | 310 (57.0)           | 1537 (56.6)         | 0.879             | 306 (57.5)                        | 305 (57.3)          | 0.951   |
| Lactate (tested) , n (%)              | 2670 (81.8)       | 479 (88.1)           | 2191 (80.7)         | <b>&lt; 0.001</b> | 467 (87.8)                        | 466 (87.6)          | 0.926   |
| <b>Severity of illness, mean (SD)</b> |                   |                      |                     |                   |                                   |                     |         |
| SAPS II                               | 48.4 $\pm$ 15.2   | 47.7 $\pm$ 14.3      | 48.5 $\pm$ 15.4     | 0.205             | 47.7 $\pm$ 14.3                   | 47.9 $\pm$ 14.4     | 0.783   |
| APS III                               | 60.4 $\pm$ 23.9   | 57.1 $\pm$ 23.4      | 61.0 $\pm$ 24.0     | <b>&lt; 0.001</b> | 57.2 $\pm$ 23.4                   | 57.8 $\pm$ 22.5     | 0.708   |
| SOFA                                  | 7.9 $\pm$ 3.7     | 7.8 $\pm$ 3.4        | 7.9 $\pm$ 3.7       | 0.712             | 7.8 $\pm$ 3.4                     | 7.7 $\pm$ 3.5       | 0.701   |
| OASIS                                 | 38.9 $\pm$ 8.7    | 38.1 $\pm$ 8.2       | 39.1 $\pm$ 8.8      | <b>0.010</b>      | 38.2 $\pm$ 8.2                    | 38.3 $\pm$ 7.8      | 0.757   |
| <b>Interventions, n (%)</b>           |                   |                      |                     |                   |                                   |                     |         |
| Ventilator use                        | 2450 (75.1)       | 466 (85.7)           | 1984 (72.9)         | <b>&lt; 0.001</b> | 454 (85.3)                        | 457 (85.9)          | 0.793   |
| Sedative Use(1st 24h)                 | 2236 (68.5)       | 439 (80.7)           | 1797 (66.1)         | <b>&lt; 0.001</b> | 427 (80.3)                        | 436 (82.0)          | 0.481   |
| RRT(1st 24 h)                         | 208 (6.4)         | 29 (5.3)             | 179 (6.6)           | 0.276             | 29 (5.5)                          | 28 (5.3)            | 0.892   |
| <b>Comorbidity disease (%)</b>        |                   |                      |                     |                   |                                   |                     |         |
| CHF                                   | 1209 (37.0)       | 277 (50.9)           | 932 (34.3)          | <b>&lt; 0.001</b> | 266 (50.0)                        | 263 (49.4)          | 0.854   |
| AFIB                                  | 1147 (35.1)       | 262 (48.2)           | 885 (32.5)          | <b>&lt; 0.001</b> | 252 (47.4)                        | 257 (48.3)          | 0.759   |
| CAD                                   | 803 (24.6)        | 243 (44.7)           | 560 (20.6)          | <b>&lt; 0.001</b> | 231 (43.4)                        | 238 (44.7)          | 0.666   |
| Renal                                 | 485 (14.9)        | 95 (17.5)            | 390 (14.3)          | 0.061             | 91 (17.1)                         | 94 (17.7)           | 0.808   |
| COPD                                  | 510 (15.6)        | 74 (13.6)            | 436 (16.0)          | 0.155             | 74 (13.9)                         | 77 (14.5)           | 0.792   |
| Stroke                                | 238 (7.3)         | 54 (9.9)             | 184 (6.8)           | <b>0.010</b>      | 51 (9.6)                          | 62 (11.7)           | 0.274   |

Covariate entries in bold have p values &lt; 0.05.

Bpm: beat per minute, CAD: coronary heart disease, CHF: congestive heart failure, AFIB: atrial fibrillation, COPD: chronic

obstructive pulmonary disease, MAP: mean arterial pressure, RRT: renal replace treatment, SAPS: simplified acute physiology score, APS: acute physiology score, SOFA: sequential organ failure assessment, OASIS: oxford acute severity of illness score, RRT: renal replace treatment, WBC: white blood count, BUN: blood urea nitrogen, BNP: brain natriuretic peptide.
