# Supplementary material for: Association between Wait Time for Transthoracic Echocardiography and 28-Day Mortality in Patients with Septic Shock: A Cohort Study
Source: MDPI journal article supplement (doi:10.3390/jcm11144131), 2022-07-16
Supplement: s1 [file s1]

Supplementary Table S3. The results of sensitivity analysis.

| <b>TTE time groups</b> | <b>HR (95% CI)</b> | <b>P value</b> |
|------------------------|--------------------|----------------|
| <b>≤10h</b>            | Ref.               |                |
| <b>&gt;10, ≤40h</b>    | 1.26 (1.01, 1.58)  | 0.043          |
| <b>&gt;40h</b>         | 0.99 (0.77, 1.26)  | 0.915          |
| <b>No TTE</b>          | 1.89 (1.51, 2.38)  | <0.0001        |
