# Supplementary material for: Association between Wait Time for Transthoracic Echocardiography and 28-Day Mortality in Patients with Septic Shock: A Cohort Study
Source: MDPI journal article supplement (doi:10.3390/jcm11144131), 2022-07-16
Supplement: s1 [file s1]

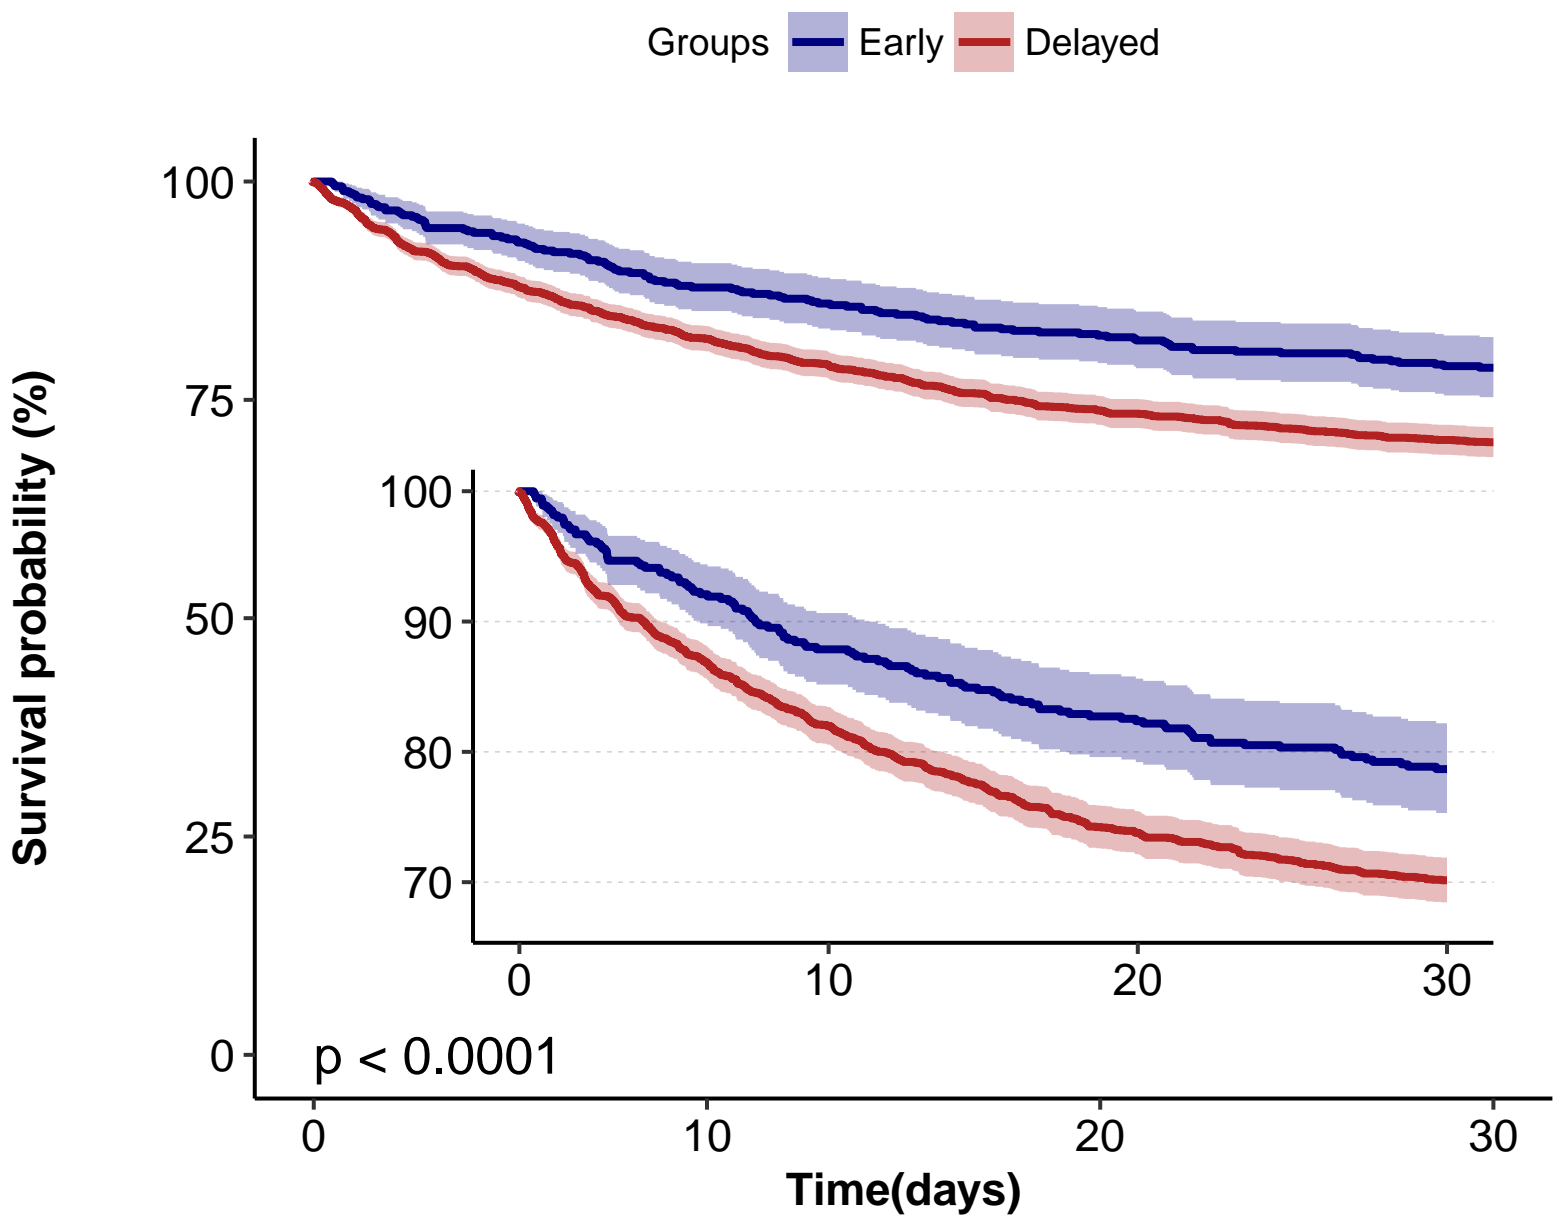

#### Number at risk

|         |      |      |      |      |
|---------|------|------|------|------|
| Early   | 544  | 478  | 448  | 428  |
| Delayed | 2718 | 2230 | 2007 | 1908 |

Supplementary Figure S2. Kaplan-Meier Survival Curves for day 28 of patients with septic shock.
