# Supplementary material for: Association between Wait Time for Transthoracic Echocardiography and 28-Day Mortality in Patients with Septic Shock: A Cohort Study
Source: J Clin Med. 2022 Jul 16;11(14):4131. doi: 10.3390/jcm11144131 (PMC9321017; doi:10.3390/jcm11144131)
Supplement: Supplementary file 1 [file jcm-11-04131-s001.zip]

Archive with 5 entries (5 files):
- Supplementary Figure S1. flowchart.pdf
- Supplementary Figure S2.KM curve.pdf
- Supplementary Table S1.pdf
- Supplementary Table S2.pdf
- Supplementary Table S3.pdf
