# Supplementary figures and images for: Association between Wait Time for Transthoracic Echocardiography and 28-Day Mortality in Patients with Septic Shock: A Cohort Study
Source: MDPI journal article supplement (doi:10.3390/jcm11144131), 2022-07-16

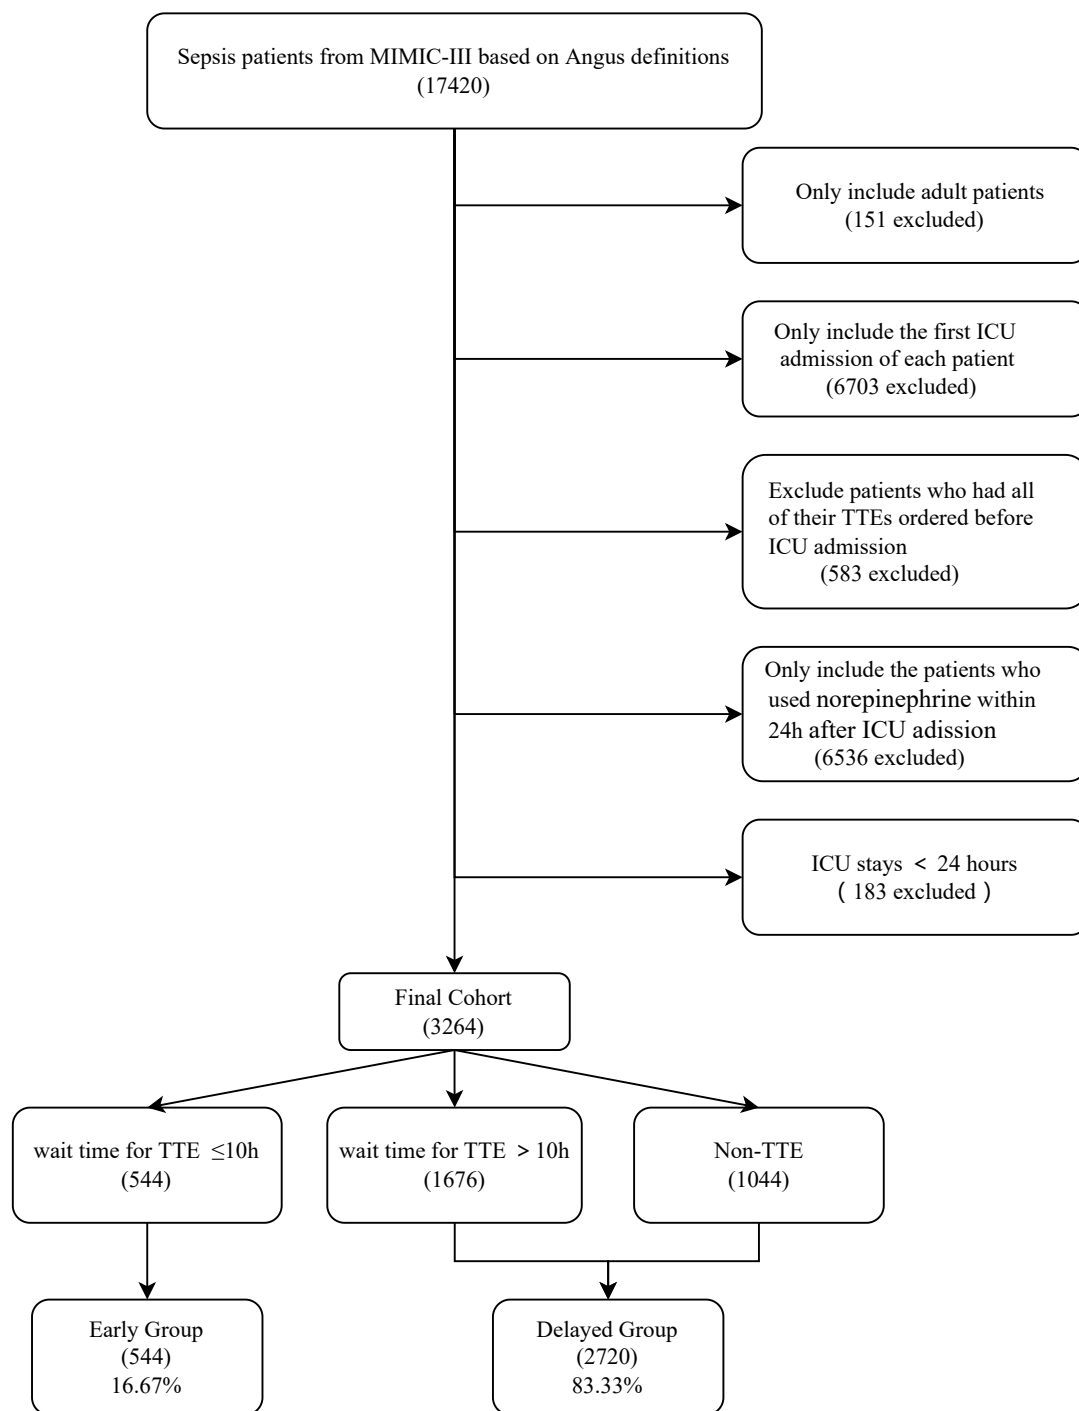

Supplementary Figure S1. Flowchart of the study cohort.

Supplement: s1 [file s1]
